# Supplementary material for: Group Lasso Regularized Deep Learning for Cancer Prognosis from Multi-Omics and Clinical Features
Source: MDPI journal article supplement (doi:10.3390/genes10030240), 2019-03-21
Supplement: s1 [file s1]

## Supplementary Materials

**Table S1: Comparison of Group Lasso (GL) to Lasso (L) and no regularization (NA) in selected TCGA tumors.** One-sided t test (alternative hypothesis is c-index based on GL is larger than others) was applied to the c-index based on the testing datasets in different tumor types. “Group lasso” performs better than “lasso” and “no regularization” in BLCA, GBM and KIRC tumor types, but does not have significant advantage for other tumor types.

| Tumor type | P value (GL VS L) | P value (GL VS NA) |
|------------|-------------------|--------------------|
| BLCA       | 0.020891546       | 0.002262145        |
| GBM        | 0.029267454       | 0.001579158        |
| KIRC       | 0.038955603       | 0.01449779         |
| SKCM       | 0.057126955       | 0.036834369        |
| ESCA       | 0.265537809       | 0.000885667        |
| HNSC       | 0.358980698       | 0.161170726        |
| LAML       | 0.361479676       | 0.100064324        |
| STAD       | 0.538972247       | 0.624022872        |
| OV         | 0.575967512       | 0.16755083         |
| SARC       | 0.675777968       | 0.644040525        |
| LUAD       | 0.690452057       | 0.085165098        |
| LIHC       | 0.744399143       | 0.602212379        |
| PAAD       | 0.942557494       | 0.114694866        |
| LUSC       | 0.998014391       | 0.282344125        |

**Table S2: Detail of the data simulation.**

| simulation | group size | # of groups | # of relevant groups | total # of relevant features | total # of features | sample size | feature matrix transformation |
|------------|------------|-------------|----------------------|------------------------------|---------------------|-------------|-------------------------------|
| s1         | 4          | 2000        | 5                    | 20                           | 8000                | 500         | no                            |
| s2A        | 1          | 8000        | 16                   | 16                           | 8000                | 500         | no                            |
| s2B        | 2          | 4000        | 8                    | 16                           | 8000                | 500         | no                            |
| s2C        | 4          | 2000        | 4                    | 16                           | 8000                | 500         | no                            |
| s2D        | 8          | 1000        | 2                    | 16                           | 8000                | 500         | no                            |
| s2E        | 16         | 500         | 1                    | 16                           | 8000                | 500         | no                            |
| s3A        | 4          | 2000        | 5                    | 20                           | 8000                | 500         | no                            |
| s3B        | 4          | 2000        | 5                    | 20                           | 8000                | 500         | quadratic                     |
| s3C        | 4          | 2000        | 5                    | 20                           | 8000                | 500         | absolute                      |

**Table S3: Top 10 genes selected by GDP for GBM**

| <b>Official Symbol</b> | <b>Official Full Name</b>                        |
|------------------------|--------------------------------------------------|
| ING1                   | inhibitor of growth family member 1              |
| RAD51                  | RAD51 recombinase                                |
| KLF15                  | Kruppel like factor 15                           |
| CDHR4                  | cadherin related family member 4                 |
| RRP8                   | ribosomal RNA processing 8                       |
| PCYT1A                 | phosphate cytidylyltransferase 1, choline, alpha |
| GRTP1                  | growth hormone regulated TBC protein 1           |
| BCL2                   | BCL2 apoptosis regulator                         |
| EHD4                   | EH domain containing 4                           |
| TYRO3                  | TYRO3 protein tyrosine kinase                    |
